## Focus on

# The 5-HT<sub>1A</sub> receptor: emerging role of a gene regulatory variant in psychopathology and pharmacogenetics

Klaus Peter Lesch and Lise Gutknecht

Clinical and Molecular Psychobiology, Department of Psychiatry and Psychotherapy, University of Würzburg, Würzburg, Germany

Received 27 September 2004; Reviewed 28 September 2004; Revised 28 September 2004; Accepted 29 September 2004

While multiple lines of evidence implicate the 5-HT<sub>1A</sub> receptor in the pathophysiology of anxiety and depression as well as in the mechanism of action of anxiolytics/antidepressants, its relevance to the therapeutic effectiveness of these drugs has been a matter of considerable debate (for review see Griebel, 1995; Hensler, 2003; Hjorth et al., 2000; Lesch et al., 2003). In the current issue of the *International Journal of Neuropsychopharmacology*, however, both Serretti et al. (2004) and Lemonde et al. (2004) make a strong argument for contribution of a functional 5-HT<sub>1A</sub> receptor gene variant in the pharmacogenetics of antidepressant treatment with prototypic tricyclics and selective serotonin reuptake inhibitors (SSRIs). Furthermore, the third study in this series by Huang and associates (2004) reveals an association of allelic variation of 5-HT<sub>1A</sub> receptor expression in a wide spectrum of psychopathology including schizophrenia, substance abuse, and panic disorder. Not unexpectedly, the failure to detect a consistent effect of this gene variation on 5-HT<sub>1A</sub> receptor functionality in the mature brain as indicated by both receptor binding in post-mortem brain and in-vivo receptor responsivity further supports a critical role of the 5-HT<sub>1A</sub> receptor in engineering neurodevelopmental processes which may have the potential to set the

stage for the brain's permissiveness for psychopathology in later life. The availability of an increasing number of functional gene variants within the serotonergic pathway together with integration of emerging concepts of developmental genetics of complex traits will provide the groundwork for the molecular dissection of syndromal dimensions and treatment response.

### Allelic variation of 5-HT<sub>1A</sub> receptor expression and psychopathology

The 5-HT<sub>1A</sub> receptor is encoded by an intronless gene (*HTR1A*) located on human chromosome 5q12.3. Several rare missense polymorphisms, including the Gly22Ser variant which results in altered agonist-elicited down-regulation, have been found within the protein coding of *HTR1A*. Moreover, Lemonde and co-workers (2003) reported a functional C(–1019)G single nucleotide polymorphism (SNP) in the transcriptional control region of *HTR1A* (*HTR1A*-1019) and demonstrated in in-vitro experiments that the G variant displays differential binding efficiency of the repressors/enhancer-type transcriptional regulator NUDR/DEAF-1. NUDR/DEAF-1 is co-expressed with both pre- and post-synaptic 5-HT<sub>1A</sub> receptors, but its regulation of *HTR1A* transcription may differ in pre-synaptic raphe vs. post-synaptic target cells (Lemonde et al., 2003).

Although initial association studies of the *HTR1A* variations produced ambiguous results in affective disorders (Arias et al., 2002; Nishiguchi et al., 2002), Lemonde and co-workers (2003) also showed that the G variant of the *HTR1A*-1019 polymorphism is associated with severe depression and suicidality. Taking the considerable comorbidity of depression and anxiety disorders into account it came as no surprise

---

Address for correspondence: Dr K. P. Lesch, Molecular and Clinical Psychobiology, Department of Psychiatry and Psychotherapy, University of Würzburg, Fuchsleinstr. 15, 97080 Würzburg, Germany.  
Tel.: +49-931-201 77600 Fax: +49-931-201 77620  
E-mail: kplesch@mail.uni-wuerzburg.de

See Huang et al. (this issue). Human 5-HT<sub>1A</sub> receptor C(–1019)G polymorphism and psychopathology; Lemonde et al. (this issue). Association of the C(–1019)G 5-HT<sub>1A</sub> functional promoter polymorphism with antidepressant response; Serretti et al. (this issue). The C(–1019)G polymorphism of the 5-HT<sub>1A</sub> gene promoter and antidepressant response in mood disorders: preliminary findings.

that associations of the G variant with anxiety- and depression-related personality traits, particularly with higher scores in Neuroticism and Harm Avoidance, as well as with the agoraphobic subtype of panic disorder were also reported (Rothe et al., 2004; Strobel et al., 2003). These findings have now been further extended by Huang et al. (2004) who report an association of the HTR1A-1019 polymorphism with panic disorder as well as in schizophrenia and substance use disorder.

Early drug-challenge studies had revealed an attenuation of 5-HT<sub>1A</sub> receptor-induced hypothermic and neuroendocrine responses in patients with panic disorder and depression, reflecting dysfunction of both pre- and post-synaptic 5-HT<sub>1A</sub> receptors (Lesch et al., 1990b, 1992). Likewise, a decrease in ligand binding to 5-HT<sub>1A</sub> receptors as assessed by positron emission tomography (PET) has been shown in fore-brain areas and in the raphe complex of affective and panic disorder patients (Drevets et al., 1999; Sargent et al., 2000). Down-regulation and hyporesponsivity of 5-HT<sub>1A</sub> receptors in patients with major depression do not seem to be reversed by antidepressant drug treatment (Lerer et al., 1999; Lesch et al., 1990a, 1991; Sargent et al., 2000), raising the possibility that low pre- and post-synaptic 5-HT<sub>1A</sub> receptor function is a trait feature and therefore a pathogenetic mechanism of disease. Taken together, the findings derived from pharmacological, imaging, and genetic approaches consistently implicate dysfunctional 5-HT<sub>1A</sub> receptors in the pathophysiology of anxiety disorders and syndromal dimensions of depression, psychosis, and substance abuse.

#### **5-HT<sub>1A</sub> receptor gene variants and antidepressant treatment response**

As the detailed mechanism of antidepressant responses continues to be enigmatic, studies have shifted focus from adaptive changes in neurotransmitter release, uptake, and metabolism to modulation of gene expression, synaptic plasticity, neurogenesis, and neuronal survival (Lesch, 2001; Santarelli et al., 2003). Treatment response to serotonergic antidepressant and anxiolytic drugs, such as the prototypical tricyclic clomipramine, and the SSRIs, such as fluvoxamine, paroxetine, citalopram, and sertraline, is influenced by genetic factors and depends on the structure or functional expression of various gene products that mediate serotonergic signalling. While treatment response is believed to involve both genetic and environmental factors, the contribution of an individual gene to drug response is likely to be modest. However,

interactions between different genes may result in a dramatic modification of drug response (additive, non-additive or multiplicative gene effects). The challenge faced by research into the genetic basis of drug response is to identify genes of relatively small effect against a background of substantial genetic and environmental variation.

The effects of 5-HT<sub>1A</sub> receptor selective agents, such as the agonist 8-hydroxy-2-(di-n-propylamino)tetralin (8-OH-DPAT) and the partial agonists ipsapirone (IPS) and gepirone, have been extensively studied in rodents (De Vry, 1995). Both agonists and partial agonists induce a dose-dependent anxiolytic effect, which correlates with the inhibition of serotonergic neuron firing, decrease of 5-HT release as well as the reduction of 5-HT signalling at post-synaptic target receptors. Blockade of the negative feedback by the selective 5-HT<sub>1A</sub> receptor antagonist WAY 100635 increases firing of the serotonergic neurons but exerts no effect on 5-HT neurotransmission or behaviour (Olivier and Miczek, 1999), while the combination with SSRIs augments increases in 5-HT levels in terminal regions. Since a given genetic predisposition, such as allelic variation in 5-HT<sub>1A</sub> function increases susceptibility to anxious or depressive features as well as depression and panic disorder, it may also lead to less favourable antidepressant responses in patients affected by mood disorders. Preliminary evidence that allelic variation of 5-HT<sub>1A</sub> receptor expression influences the response to antidepressant treatment is now provided by two independent studies. Serretti and colleagues (2004) assessed the severity of depressive symptoms in 151 patients with major depression and 111 bipolar patients before and following 6 weeks of treatment with the SSRI fluvoxamine and demonstrate that in bipolar disorder but not in unipolar depression, patients homozygous for the C variant of the HTR1A-1019 polymorphism showed a better response compared to carriers of the G allele. Interestingly, the results failed to reveal an interaction between the HTR1A-1019 polymorphism and a previously reported effect of a functional gene variant of the 5-HT transporter.

Lemondé et al. (2004) also report that antidepressant response to the SSRI fluoxetine, norepinephrine reuptake inhibitor nefazodone, and 5-HT<sub>1A</sub> agonist flibanserin, which desensitize the 5-HT<sub>1A</sub> autoreceptor as one of their mechanisms of action, was associated with HTR1A-1019 polymorphism in 118 depressed patients. Patients homozygous for the G variant of the HTR1A-1019 polymorphism improved significantly less on flibanserin and in pooled antidepressant treatment groups were twice as likely

to be non-responders as those with the C/C genotype. These findings further corroborate the hypothesis that genetic variations in *HTR1A* may not only predispose to psychiatric disorders, but may also contribute to individual differences in responsiveness to antidepressant treatment.

### 5-HT<sub>1A</sub> receptors in the neurodevelopmental perspective

Intriguingly, Huang and associates (2004) have also been able to demonstrate that 5-HT<sub>1A</sub> receptor binding in the prefrontal cortex of suicide victims was not associated with genotype. These findings suggest that 5-HT<sub>1A</sub> receptor availability in the mature brain is modulated by factors that obscure the effects of gene regulatory mechanisms on its expression. Furthermore, it remains unclear whether allelic variation of 5-HT<sub>1A</sub> receptor function is equally operative at both the somatodendritic autoreceptor and the post-synaptic receptor level. Somatodendritic 5-HT<sub>1A</sub> autoreceptors are predominantly located on 5-HT neurons and dendrites in the brainstem raphe complex. Their activation by 5-HT or 5-HT<sub>1A</sub> agonists decreases the firing rate of serotonergic neurons and subsequently reduces the synthesis, turnover, and release of 5-HT from nerve terminals in projection areas. Post-synaptic 5-HT<sub>1A</sub> receptors are widely distributed in forebrain regions that receive serotonergic input, notably in the cortex, hippocampus, septum, amygdala, and hypothalamus. Their activation results in membrane hyperpolarization and decreased neuronal excitability. While 5-HT<sub>1A</sub> receptor expression is also modulated gender-dependently by steroid hormones, 5-HT<sub>1A</sub> receptor-mediated signalling is, in turn, an important regulator of downstream gene expression through its coupling to G proteins that inhibit adenylyl cyclase and modulation of GIRK2 channels.

In order to test the effect of HTR1A-1019 genotype on 5-HT<sub>1A</sub> receptor responsivity *in vivo*, we examined hypothermic and neuroendocrine responses to the selective 5-HT<sub>1A</sub> receptor ligand IPS in 27 healthy subjects who had received 0.3 mg/kg of IPS or placebo under double-blind, random-assignment conditions. 5-HT<sub>1A</sub> receptor-mediated thermoregulatory ( $F_{2,24} = 0.06$ ,  $p = 0.93$ ) and ACTH/cortisol responses ( $F_{2,24} = 0.67$ ,  $p = 0.52$  and  $F_{2,24} = 0.00$ ,  $p = 0.99$  respectively) to IPS revealed no significant difference between genotypes and pre- or post-synaptic 5-HT<sub>1A</sub> function (Lesch et al., 2004) (Figure 1). Despite the limitations of the sample size, these preliminary results provide further support for the notion that 5-HT<sub>1A</sub> receptor

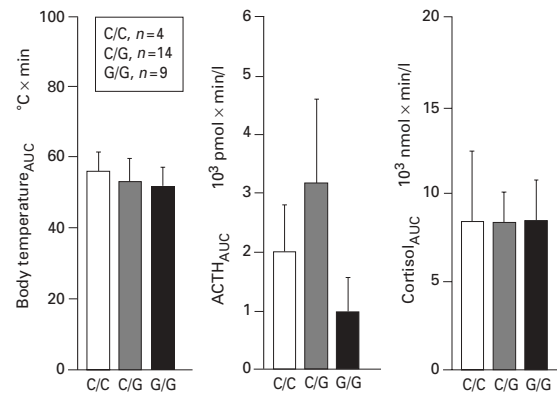

**Figure 1.** Effect of HTR1A-1019 genotype on pre- and post-synaptic 5-HT<sub>1A</sub> receptor responsivity *in vivo*. Hypothermic and neuroendocrine responses to the selective 5-HT<sub>1A</sub> receptor ligand ipsapirone (IPS) were examined in 27 healthy subjects. IPS tests were conducted at rest in bed and the subjects who were familiar with the investigative setting remained awake throughout the study. Each subject received 0.3 mg/kg IPS hydrochloride or identical placebo tablets orally at 16:00 hours under double-blind, random-assignment conditions on separate days as previously reported (Lesch et al., 1991). For measurement of plasma ACTH and cortisol, blood was collected at -30, 0, 15, 30, 45, 60, 75, 90, 105, 120, 150 and 180 min and sublingual body temperature was recorded at -60, -30, 0, 30, 60, 90, 120, 150, and 180 min using a high resolution thermistor probe. The hypothermic and ACTH/cortisol responses to IPS were calculated as the net (IPS–placebo difference) area under the curve (AUC<sub>0-180</sub>) using trapezoidal integration. HTR1A-1019 genotypes were determined as reported by Strobel and co-workers (2003). The effect of the HTR1A-1019 genotype on IPS-induced hypothermia and ACTH/cortisol concentrations was tested by analysis of variance (ANOVA). 5-HT<sub>1A</sub> receptor-mediated thermoregulatory and neuroendocrine responses to IPS revealed no significant difference between HTR1A-1019 genotypes and pre- or postsynaptic 5-HT<sub>1A</sub> function.

responsivity in the adult brain is not robustly influenced by the HTR1A-1019 polymorphism.

Converging lines of evidence that 5-HT<sub>1A</sub> receptor deficiency or dysfunction is involved in anxiety and mood disorders encouraged investigators to genetically manipulate the 5-HT<sub>1A</sub> receptor in mice. As anticipated, mice with a targeted inactivation of the *HTR1A* display a spontaneous phenotype that is associated with a gender-modulated and gene/dose-dependent increase of anxiety-related behaviour and stress reactivity in several conflict paradigms (Lesch et al., 2003; Toth, 2003). Activation of pre-synaptic 5-HT<sub>1A</sub> receptors provides the brain with an auto-inhibitory feedback system controlling 5-HT neuro-

transmission. Thus, enhanced anxiety-related behaviour probably represents a consequence of increased terminal 5-HT availability resulting from the lack or reduction in pre-synaptic somatodendritic 5-HT<sub>1A</sub> autoreceptor negative feedback function (Lesch and Mössner, 1999).

This mechanism is also consistent with recent theoretical models of fear and anxiety that are primarily based upon pharmacologically derived data. The cumulative reduction in serotonergic impulse flow to septo-hippocampal and other limbic and cortical areas involved in the control of anxiety is believed to explain the anxiolytic effects of ligands with selective affinity for the 5-HT<sub>1A</sub> receptor in some animal models of anxiety-related behavior. This notion is based, in part, on evidence that 5-HT<sub>1A</sub> agonists (e.g. 8-OH-DPAT) and antagonists (e.g. WAY 100635) have anxiolytic or anxiogenic effects respectively. However, to complicate matters further, 8-OH-DPAT has anxiolytic effects when injected in the raphe nucleus, whereas it is anxiogenic when applied to the hippocampus. Thus, stimulation of post-synaptic 5-HT<sub>1A</sub> receptors has been proposed to elicit anxiogenic effects, while activation of 5-HT<sub>1A</sub> autoreceptors is thought to induce anxiolytic effects via suppression of serotonergic neuronal firing resulting in attenuated 5-HT release in limbic terminal fields.

Since the 5-HT<sub>1A</sub> receptor is expressed differentially in distinct brain subsystems, it was of interest to clarify whether pre- or post-synaptic receptors are required to maintain normal expression of anxiety-related behaviour in both humans and the animal model. With an elegant conditional rescue approach, Gross and co-workers (2002) showed that expression of the 5-HT<sub>1A</sub> receptor in the hippocampus and cortex but not in the raphe nuclei is required to rescue the behavioural phenotype of 5-HT<sub>1A</sub> knockout mice. The findings indicate that deletion of the 5-HT<sub>1A</sub> receptor in mice, specifically in forebrain structures, results in a robust anxiety-related phenotype and that this phenotype in 5-HT<sub>1A</sub> knockout mice is caused by the absence of the receptor during a critical period of postnatal development, whereas inactivation of 5-HT<sub>1A</sub> in adulthood does not affect anxiety. Even more importantly, the findings further substantiate the view of a central role for 5-HT and the 5-HT<sub>1A</sub> receptor in the early development of neurocircuits mediating emotion (Lesch, 2003). Although there is converging evidence that the 5-HT<sub>1A</sub> receptor mediates depression- and anxiety-related behaviour, the neurodevelopmental mechanism that renders 5-HT<sub>1A</sub> receptor-deficient mice more anxious is highly complex and remains to be elucidated in its details (Gross and Hen, 2004).

In conclusion, allelic variation in 5-HT<sub>1A</sub> receptor expression seems to play a critical role in the development and modulation of individual differences in anxiety- and depression-related personality traits as well as in the pathophysiology of anxiety disorders and syndromal dimensions of depression, psychosis, and substance abuse. Evidence that this polymorphism also influences therapeutic responses to serotonergic agents may have implications for tailoring individual antidepressant/anxiolytic treatment.

### Acknowledgements

We thank G. Ortega and N. Steigerwald for excellent technical assistance. The work was supported by the Deutsche Forschungsgemeinschaft (SFB 581; KFO 125/1-1), and the European Commission (NEWMOOD LSHM-CT-2003-503474).

### Statement of Interest

None.

### References

- Arias B, Arranz MJ, Gasto C, Catalan R, Pintor L, Gutierrez B, Kerwin RW, Fananas L (2002). Analysis of structural polymorphisms and C-1018G promoter variant of the 5-HT<sub>1A</sub> receptor gene as putative risk factors in major depression. *Molecular Psychiatry* 7, 930–932.
- De Vry J (1995). 5-HT<sub>1A</sub> receptor agonists: recent developments and controversial issues. *Psychopharmacology (Berlin)* 121, 1–26.
- Drevets WC, Frank E, Price JC, Kupfer DJ, Holt D, Greer PJ, Huang Y, Gautier C, Mathis C (1999). PET imaging of serotonin 1A receptor binding in depression. *Biological Psychiatry* 46, 1375–1387.
- Griebel G (1995). 5-Hydroxytryptamine-interacting drugs in animal models of anxiety disorders: more than 30 years of research. *Pharmacology and Therapeutics* 65, 319–395.
- Gross C, Hen R (2004). The developmental origins of anxiety. *Nature Reviews. Neuroscience* 5, 545–552.
- Gross C, Zhuang X, Stark K, Ramboz S, Oosting R, Kirby L, Santarelli L, Beck S, Hen R (2002). Serotonin<sub>1A</sub> receptor acts during development to establish normal anxiety-like behaviour in the adult. *Nature* 416, 396–400.
- Hensler JG (2003). Regulation of 5-HT<sub>1A</sub> receptor function in brain following agonist or antidepressant administration. *Life Sciences* 72, 1665–1682.
- Hjorth S, Bengtsson HJ, Kullberg A, Carlzon D, Peilott H, Auerbach SB (2000). Serotonin autoreceptor function and antidepressant drug action. *Journal of Psychopharmacology* 14, 177–185.
- Huang YY, Battistuzzi C, Oquendo MA, Harkavy-Friedman J, Greenhill L, Zalsman G, Brodsky B, Arango V, Brent DA, Mann JJ (2004). Human 5-HT<sub>1A</sub> receptor C(–1019)G

- polymorphism and psychopathology. *International Journal of Neuropsychopharmacology* 7, 441–451.
- Lemonde S, Du L, Bakish D, Hrdina P, Albert PR** (2004). Association of the C(-1019)G 5-HT1A functional promoter polymorphism with antidepressant response. *International Journal of Neuropsychopharmacology* 7, 501–506.
- Lemonde S, Turecki G, Bakish D, Du L, Hrdina PD, Bown CD, Sequeira A, Kushwaha N, Morris SJ, Basak A, Ou XM, Albert PR** (2003). Impaired repression at a 5-hydroxytryptamine 1A receptor gene polymorphism associated with major depression and suicide. *Journal of Neuroscience* 23, 8788–8799.
- Lerer B, Gelfin Y, Gorfine M, Allolio B, Lesch KP, Newman ME** (1999). 5-HT1A receptor function in normal subjects on clinical doses of fluoxetine: blunted temperature and hormone responses to ipsapirone challenge. *Neuropsychopharmacology* 20, 628–639.
- Lesch KP** (2001). Serotonergic gene expression and depression: implications for developing novel antidepressants. *Journal of Affective Disorders* 62, 57–76.
- Lesch KP** (2003). Neuroticism and serotonin: a developmental genetic perspective. In: Plomin R, DeFries J, Craig I, McGuffin P (Eds.), *Behavioral Genetics in the Postgenomic Era* (pp. 389–423). Washington, DC: American Psychiatric Press.
- Lesch KP, Disselkamp-Tietze J, Schmidtke A** (1990a). 5-HT1A receptor function in depression: effect of chronic amitriptyline treatment. *Journal of Neural Transmission: General Section* 80, 157–161.
- Lesch KP, Hoh A, Schulte HM, Osterheider M, Muller T** (1991). Long-term fluoxetine treatment decreases 5-HT1A receptor responsivity in obsessive-compulsive disorder. *Psychopharmacology (Berlin)* 105, 415–420.
- Lesch KP, Mayer S, Disselkamp-Tietze J, Hoh A, Wiesmann M, Osterheider M, Schulte HM** (1990b). 5-HT1A receptor responsivity in unipolar depression. Evaluation of ipsapirone-induced ACTH and cortisol secretion in patients and controls. *Biological Psychiatry* 28, 620–628.
- Lesch KP, Mössner R** (1999). 5-HT1A receptor inactivation: anxiety or depression as a murine experience. *International Journal of Neuropsychopharmacology* 2, 327–331.
- Lesch KP, Strobel A, Deckert J, Gutknecht L** (2004). Allelic variation in 5-HT1A receptor expression in anxiety- and depression-related personality traits, and panic disorder. Presentation at the 6th Neurochemistry Winter Conference, Sölden, Austria, 1 April 2004.
- Lesch KP, Wiesmann M, Hoh A, Muller T, Disselkamp-Tietze J, Osterheider M, Schulte HM** (1992). 5-HT1A receptor-effector system responsivity in panic disorder. *Psychopharmacology (Berlin)* 106, 111–117.
- Lesch KP, Zeng Y, Reif A, Gutknecht L** (2003). Anxiety-related traits in mice with modified genes of the serotonergic pathway. *European Journal of Pharmacology* 480, 185–204.
- Nishiguchi N, Shirakawa O, Ono H, Nishimura A, Nushida H, Ueno Y, Maeda K** (2002). Lack of an association between 5-HT1A receptor gene structural polymorphisms and suicide victims. *American Journal of Medical Genetics* 114, 423–425.
- Olivier B, Miczek KA** (1999). Fear and anxiety: mechanisms, models and molecules. In: Dodman N, Shuster I (Eds.), *Psychopharmacology of Animal Behavior Disorders* (pp. 105–121). London: Blackwell.
- Rothe C, Gutknecht L, Freitag CM, Tauber R, Franke P, Fritze J, Wagner G, Peikert G, Wenda B, Sand P, Jacob C, Rietschel M, Nöthen MM, Garritsen H, Fimmers R, Deckert J, Lesch KP** (2004). Association of a functional -1019C>G 5-HT1A receptor gene polymorphism with panic disorder with agoraphobia. *International Journal of Neuropsychopharmacology* 7, 189–192.
- Santarelli L, Saxe M, Gross C, Surget A, Battaglia F, Dulawa S, Weisstaub N, Lee J, Duman R, Arancio O, Belzung C, Hen R** (2003). Requirement of hippocampal neurogenesis for the behavioral effects of antidepressants. *Science* 301, 805–809.
- Sargent PA, Kjaer KH, Bench CJ, Rabiner EA, Messa C, Meyer J, Gunn RN, Grasby PM, Cowen PJ** (2000). Brain serotonin1A receptor binding measured by positron emission tomography with [<sup>11</sup>C]WAY-100635: effects of depression and antidepressant treatment. *Archives of General Psychiatry* 57, 174–180.
- Serretti A, Artioli P, Lorenzi C, Pirovano A, Tubazio V, Zanardi R** (2004). The C(-1019)G polymorphism of the 5-HT1A gene promoter and antidepressant response in mood disorders: preliminary findings. *International Journal of Neuropsychopharmacology* 7, 453–460.
- Strobel A, Gutknecht L, Zheng Y, Reif A, Brocke B, Lesch KP** (2003). Allelic variation of serotonin receptor 1A function is associated with anxiety- and depression-related traits. *Journal of Neural Transmission* 110, 1445–1453.
- Toth M** (2003). 5-HT(1A) receptor knockout mouse as a genetic model of anxiety. *European Journal of Pharmacology* 463, 177–184.
